# Hydrogen Sulfide Prevents Hydrogen Peroxide-Induced Activation of Epithelial Sodium Channel through a PTEN/PI(3,4,5)P<sub>3</sub> Dependent Pathway

Jianing Zhang<sup>1</sup>, Shuo Chen<sup>1</sup>, Huibin Liu<sup>1</sup>, Bingkun Zhang<sup>1</sup>, Ying Zhao<sup>1</sup>, Ke Ma<sup>1</sup>, Dan Zhao<sup>1</sup>, Qiushi Wang<sup>1</sup>, Heping Ma<sup>2\*</sup>, Zhiren Zhang<sup>1\*</sup>

**1** Departments of Clinical Pharmacy and Cardiology, the 2nd Affiliated Hospital, Harbin Medical University, Key Laboratories of Education Ministry for Myocardial Ischemia Mechanism and Treatment, Harbin, P.R. China, **2** Department of Physiology, Emory University School of Medicine, Atlanta, Georgia, United States of America

## Abstract

Sodium reabsorption through the epithelial sodium channel (ENaC) at the distal segment of the kidney plays an important role in salt-sensitive hypertension. We reported previously that hydrogen peroxide (H<sub>2</sub>O<sub>2</sub>) stimulates ENaC in A6 distal nephron cells via elevation of phosphatidylinositol 3,4,5-trisphosphate (PI(3,4,5)P<sub>3</sub>) in the apical membrane. Here we report that H<sub>2</sub>S can antagonize H<sub>2</sub>O<sub>2</sub>-induced activation of ENaC in A6 cells. Our cell-attached patch-clamp data show that ENaC open probability (*P*<sub>o</sub>) was significantly increased by exogenous H<sub>2</sub>O<sub>2</sub>, which is consistent with our previous finding. The aberrant activation of ENaC induced by exogenous H<sub>2</sub>O<sub>2</sub> was completely abolished by H<sub>2</sub>S (0.1 mM NaHS). Pre-treatment of A6 cells with H<sub>2</sub>S slightly decreased ENaC *P*<sub>o</sub>; however, in these cells H<sub>2</sub>O<sub>2</sub> failed to elevate ENaC *P*<sub>o</sub>. Confocal microscopy data show that application of exogenous H<sub>2</sub>O<sub>2</sub> to A6 cells significantly increased intracellular reactive oxygen species (ROS) level and induced accumulation of PI(3,4,5)P<sub>3</sub> in the apical compartment of the cell membrane. These effects of exogenous H<sub>2</sub>O<sub>2</sub> on intracellular ROS levels and on apical PI(3,4,5)P<sub>3</sub> levels were almost completely abolished by treatment of A6 cells with H<sub>2</sub>S. In addition, H<sub>2</sub>S significantly inhibited H<sub>2</sub>O<sub>2</sub>-induced oxidative inactivation of the tumor suppressor phosphatase and tensin homolog (PTEN) which is a negative regulator of PI(3,4,5)P<sub>3</sub>. Moreover, BPV<sub>(pic)</sub>, a specific inhibitor of PTEN, elevated PI(3,4,5)P<sub>3</sub> and ENaC activity in a manner similar to that of H<sub>2</sub>O<sub>2</sub> in A6 cells. Our data show, for the first time, that H<sub>2</sub>S prevents H<sub>2</sub>O<sub>2</sub>-induced activation of ENaC through a PTEN-PI(3,4,5)P<sub>3</sub> dependent pathway.

**Citation:** Zhang J, Chen S, Liu H, Zhang B, Zhao Y, et al. (2013) Hydrogen Sulfide Prevents Hydrogen Peroxide-Induced Activation of Epithelial Sodium Channel through a PTEN/PI(3,4,5)P<sub>3</sub> Dependent Pathway. PLoS ONE 8(5): e64304. doi:10.1371/journal.pone.0064304

**Editor:** Michael B. Butterworth, University of Pittsburgh, School of Medicine, United States of America

**Received:** January 17, 2013; **Accepted:** April 12, 2013; **Published:** May 31, 2013

**Copyright:** © 2013 Zhang et al. This is an open-access article distributed under the terms of the Creative Commons Attribution License, which permits unrestricted use, distribution, and reproduction in any medium, provided the original author and source are credited.

**Funding:** This study was supported by the Key Project of the Chinese National Program for Fundamental Research and Development (973 Program, 2012CB517803), the National Natural Science Foundation of China (81270340 and 81070217), and the Postdoctoral Science Foundation of China (2012M520775). The funders had no role in study design, data collection and analysis, decision to publish, or preparation of the manuscript.

**Competing Interests:** The authors have declared that no competing interests exist.

\* E-mail: zhirenz@yahoo.com (ZZ); heping.ma@emory.edu (HM)

## Introduction

The epithelial sodium channel (ENaC) mediates Na<sup>+</sup> absorption across epithelial cells in the kidney collecting duct, lung, distal colon, and sweat duct. Na<sup>+</sup> transport is critical for the maintenance of Na<sup>+</sup> homeostasis and thus plays a critical role in maintenance of salt balance and systemic blood pressure. Over-activation of ENaC causes hypertension, as seen in Liddle's syndrome [1]. However, it remains unclear whether enhanced ENaC activity accounts for salt-sensitive hypertension. In salt-sensitive animal model, high salt intake leads to an increase in the production of reactive oxygen species (ROS) including superoxide (O<sub>2</sub><sup>-</sup>) [2] and H<sub>2</sub>O<sub>2</sub> [3] in the kidney by stimulating NAD(P)H oxidase [4]. ROS play an important role in signal transduction and have been shown to influence ENaC activity. One example is that aldosterone can regulate ENaC activity by elevating superoxide (O<sub>2</sub><sup>-</sup>) production in A6 cells [5].

Our recent study shows that H<sub>2</sub>O<sub>2</sub> stimulates ENaC in A6 distal nephron cells via elevation of PI(3,4,5)P<sub>3</sub> [6], which is known to stimulate ENaC [7]. PI(3,4,5)P<sub>3</sub>, the product of the phosphorylation of phosphatidylinositol 4,5-bisphosphate (PI(3,4,5)P<sub>2</sub>) by phosphoinositide 3-kinase (PI3K), plays an important role in

transducing signals from growth factors, hormones and other extracellular activators to intracellular pathways. The tumor suppressor phosphatase and tensin homolog (PTEN), a lipid phosphatase, reduces the cellular concentration of PI(3,4,5)P<sub>3</sub> and acts as a negative regulator of PI3K signaling pathways [8]. Thus, loss of PTEN activity would result in the accumulation of PI(3,4,5)P<sub>3</sub>. It has been proposed that inactivation of PTEN by H<sub>2</sub>O<sub>2</sub> might be necessary to increase the abundance of PI(3,4,5)P<sub>3</sub> and subsequent activation of Akt [9,10].

Hydrogen sulfide (H<sub>2</sub>S), as an important intracellular and intercellular gaseous messenger molecule, regulates multiple physiological and pathological processes, including vascular relaxation [11], angiogenesis [12], ischemia/reperfusion (I/R) injury of the heart [13], glucose homeostasis [14] and the function of ion channels [15]. Accumulating evidence demonstrates that H<sub>2</sub>S exerts protective effects against a number of injuries in many organs. One of the main mechanisms responsible for H<sub>2</sub>S protection is antioxidation, not only by enhancing reduced glutathione (GSH, a major cellular antioxidant) [16], but also by directly scavenging superoxide anions [17], H<sub>2</sub>O<sub>2</sub> [18] and peroxynitrite [19] to suppress oxidative stress. We therefore

hypothesize that H<sub>2</sub>S may exert a protective effect against H<sub>2</sub>O<sub>2</sub>-induced ENaC activity in A6 cells. However, to our knowledge, the direct regulation of ENaC activity by H<sub>2</sub>S has never been demonstrated. The A6 cell line, derived from the distal nephron of *Xenopus* kidney, is an established system for *in vitro* study of ENaC regulation. In the present study, we show that H<sub>2</sub>S reverses H<sub>2</sub>O<sub>2</sub>-induced aberrant activation of ENaC by diminishing oxidized PTEN.

## Materials and Methods

### Cell Culture

A6 cells are an established renal cell line derived from the distal segment of *Xenopus laevis* nephron, which is an appropriate cell model for studying ENaC. A6 cells, purchased from American Type Culture Collection (Rockville, MD, USA), were grown in the medium consisting of 2 parts of DMEM/F-12 (1:1) medium (Invitrogen, USA), 1 part of H<sub>2</sub>O, 15 mM NaHCO<sub>3</sub> (total Na<sup>+</sup> = 101 mM), 2 mM L-glutamine, 10% fetal bovine serum (Invitrogen, USA), 25 units/ml penicillin, 25 units/ml streptomycin, as previously described [6]. A6 cells were cultured in plastic flasks in the presence of 1 μM aldosterone at 26°C and 4% CO<sub>2</sub>. After the cells became 70% confluent in the plastic flasks, they were subcultured on the polyester membrane of either *Transwell* inserts (Corning Costar Co, USA) for confocal microscopy assays or *Snapwell* inserts (Corning Costar Co, USA) for cell-attached patch-clamp analysis. To facilitate polarization cells were cultured for at least two to three weeks before accessing experiments.

### Patch-clamp Recording

ENaC single-channel currents were recorded using cell-attached patch-clamp configuration with an Axopatch-200B amplifier (Axon Instruments, USA) as described in our previous works [20,21]. A6 cells were thoroughly washed with NaCl solution containing 100 mM NaCl, 3.4 mM KCl, 1 mM CaCl<sub>2</sub>, 1 mM MgCl<sub>2</sub>, and 10 mM HEPES, adjusted pH to 7.4 with NaOH. Borosilicate glass electrodes had tip resistances of 7–10 MΩ when filled with NaCl solution. Experiments were conducted at room temperature (22–25°C). The data were acquired by application of 0 mV pipette potential and were sampled at 5 k Hz and low-pass filtered at 1 k Hz with Clampex 10.2 software (Molecular Devices, Sunnyvale, CA, USA). Prior to analysis, the single-channel traces were further filtered at 30 Hz. The total number of functional channels in the patch was determined by observing the number of peaks detected on the current amplitude histograms during at least 10-min recording period. The open probability (*P*<sub>o</sub>) of ENaC before and after application of chemicals was calculated using Clampfit 10.2 (Molecular Devices, Sunnyvale, CA, USA). Control ENaC activity was recorded at 2 min after forming the cell-attached mode when the ENaC activity had stabilized. We usually recorded at least 30 min before any experimental manipulation in the same patch.

### Stable Transfection of a6 Cells with Enhanced Green Fluorescence Protein-tagged Pleckstrin Homology Domain of Akt (EGFP-PH-Akt)

To detect intracellular PI(3,4,5)P<sub>3</sub> levels, A6 cells were cultured on the polyester membrane of *Transwell* inserts at a high density to allow the cells to be confluent within three days [6]. Confluent A6 cells were treated for 20 min with Ca<sup>2+</sup>-free and Mg<sup>2+</sup>-free PBS (DPBS, Invitrogen, USA), which was modified with H<sub>2</sub>O (3 parts of PBS with 1 part of H<sub>2</sub>O) to match the osmolarity of amphibian cells. A6 cells were incubated with transfection reagent containing EGFP-PH-Akt DNA construct and Lipofectamin 2000 (Invitro-

gen, USA) for six hrs and then incubated with regular culture medium for one day. The EGFP-PH-Akt DNA construct contains a geneticin (G418) resistance gene and the transfected cells were continuously cultured, in the presence of 600 μg/mL G418. Four weeks after transfection, cells were ready for assessing further experiments.

### Confocal Laser Scanning Microscopy

Studies were performed using confocal microscopy (Olympus Fluoview1000, Japan) as previously described [6]. Prior to experiments, A6 cells were washed twice with NaCl solution. Immediately following each experimental manipulation, the polyester membrane that supports the A6 cell monolayer was quickly excised and mounted on a glass slide with a drop of NaCl solution to keep the cells alive. Confocal microscopy XY or XZ scanning of A6 cells was accomplished within five min. XY optical sections were performed to provide a flat view of the cells near the apical membrane, across the lateral membrane, or near the basal membrane. XZ optical sections were also performed to provide a lateral view of the cells. In each set of experiments, images were taken using the same parameter settings. The fluorescent intensity of GFP-PH-Akt represents the levels of PI(3,4,5)P<sub>3</sub> near the apical compartment of the cell membrane. The fluorescent intensity was measured in a randomly selected field including a group of cells by setting the amplitude of the Z-step as 9.5±0.5 μM from the basolateral membrane. Average fluorescent intensity of an individual experiment was obtained as follow: fluorescent intensity measured from a group of cells divided by the number of cells in the randomly selected field.

### Detection of Intracellular Reactive Oxygen Species (ROS) by Confocal Microscopy

A6 cells grown on polyester membrane of *Transwell* inserts were loaded with 2.5 μM 5-(and-6)-carboxy-2',7'-dichlorodihydrofluorescein diacetate (carboxy-H<sub>2</sub>DCFDA), a membrane-permeable ROS-sensitive fluorescent probe (Invitrogen, USA), which became fluorescent when oxidized. Prior to application of exogenous H<sub>2</sub>O<sub>2</sub>, A6 cells were treated by an iron chelator, 50 μM 2,2'-dipyridyl for three min [22]. Labeled cells were washed twice in modified DPBS before analyzed by confocal microscopy. ROS levels were represented with fluorescence intensity.

### Western Blot Analysis

The expression of PTEN protein was examined using western blot experiments. Cells were incubated at 26°C in the medium with or without NaHS. Cells were then harvested and total protein was extracted. Cell lysate was loaded and electrophoresed on a 10% SDS-polyacrylamide gel with running buffer and transferred to polyvinylidene fluoride (PVDF) membranes. After one hr of blocking with 5% nonfat dry milk in phosphate-buffered saline (PBS), membranes were incubated with primary antibody specific to PTEN (Abcam, UK; 1:500 dilution) or horseradish peroxidase-conjugated β-actin (Santa Cruz Biotechnology, USA; 1:5000 dilution) overnight with gentle agitation at 4°C. The next day, the membrane was incubated with a horseradish peroxidase-conjugated secondary antibody (Santa Cruz Biotechnology, USA; 1:5000 dilution) for one hr at room temperature. The membranes were developed using an enhanced chemiluminescence (ECL) kit (Invitrogen, USA) and scanned densitometry (Bio-Rad, USA). The band densities were quantified by densitometry using Quantity One Software and the image densities were normalized to densities measured in control samples.

## Detection of Oxidized PTEN

Cells subjected to a various treatments including an iron chelator, 50  $\mu$ M 2,2'-dipyridyl were scraped into 0.2 ml of ice-cold 50% trichloroacetic acid and transferred to microfuge tubes. The cell suspensions were sonicated briefly and then centrifuged at 2000 g for 5 min at 4°C. The supernatants were removed, and the pellets were washed with cold acetone twice and then solubilized in 0.2 ml of 100 mM Tris-HCl (pH 6.8) buffer containing 2% SDS and 40 mM n-ethylmaleimide (NEM; Sigma, USA). Portions (10  $\mu$ l) of the solubilized pellets were subjected to SDS-PAGE under non-reducing conditions (without DTT) and transferred to a PVDF membrane. The membrane was then treated with PTEN specific antibody as ascribed above. Reduced and oxidized forms of PTEN were detected as described previously [10].

## Chemicals and Reagents

Unless otherwise noted, all chemicals and reagents were purchased from Sigma Aldrich (St. Louis, MO, USA). H<sub>2</sub>O<sub>2</sub> was purchased from Fisher Scientific (USA) and was diluted with NaCl solution prior to assessing experiments.

## Data Analysis

Data are presented as mean  $\pm$  S.E. Statistical analysis was performed with SigmaPlot and SigmaStat Software (Jandel Scientific, CA, USA). Paired *t* test or student *t* test was used for comparisons between pre- and post-treatment activities. Analysis of variance was used for multiple comparisons among various treatment groups. Differences were considered statistically when  $P < 0.05$ .

## Results

### H<sub>2</sub>O<sub>2</sub>-induced Enhancement of ENaC Activity is Reversed by H<sub>2</sub>S in A6 Cells

To investigate the effect of H<sub>2</sub>S on H<sub>2</sub>O<sub>2</sub>-induced enhancement of ENaC activity, cell-attached patch-clamp technique was employed. Single-channel current of ENaC was recorded for about 90 min in each experiment. Since the responses had a long latency, in the figures we omitted a period of record and only showed the representative recordings for about six min before and after application of either H<sub>2</sub>O<sub>2</sub> or NaHS (a donor of H<sub>2</sub>S) to the cells. Consistent with our previous findings, addition of 3 mM H<sub>2</sub>O<sub>2</sub> to the basolateral bath led to a significant increase both in ENaC  $P_o$  from  $0.28 \pm 0.04$  to  $0.57 \pm 0.10$  ( $P < 0.01$ ;  $n = 6$ ) and in the single-channel amplitude of ENaC (Figure 1A) [6]. In the presence of H<sub>2</sub>O<sub>2</sub>, application of 0.1 mM NaHS to the basolateral bath led to a significant decrease in ENaC  $P_o$  from  $0.57 \pm 0.10$  to  $0.29 \pm 0.07$  ( $P < 0.01$ ;  $n = 6$ ) (Figure 1A and C). In contrast, application of 0.1 mM NaHS to the basolateral bath slightly decreased ENaC  $P_o$  from  $0.32 \pm 0.04$  to  $0.26 \pm 0.05$  ( $P > 0.05$ ;  $n = 6$ ); interestingly, H<sub>2</sub>O<sub>2</sub> failed to increase intercellular ROS (Figure 2B and D). We have carried out the MTT experiments to detect whether H<sub>2</sub>S affects cell viability (Text S1). The MTT assay showed that H<sub>2</sub>S at 0.05, 0.1 and 0.3 mM had no effect on cell viability (Figure S1). These results suggest that H<sub>2</sub>S exerts a strong protective effect on H<sub>2</sub>O<sub>2</sub>-induced enhancement of ENaC activity in A6 cells.

### H<sub>2</sub>S Attenuates Exogenous H<sub>2</sub>O<sub>2</sub>-induced Oxidative Stress in A6 Cells

Inhibition of oxidative stress is thought to account for the cardioprotective effects of H<sub>2</sub>S during ischemia/reperfusion (I/R) [13,23]. However, it is unknown whether H<sub>2</sub>S could reduce H<sub>2</sub>O<sub>2</sub>-induced oxidative stress in A6 cells. Therefore, the levels of

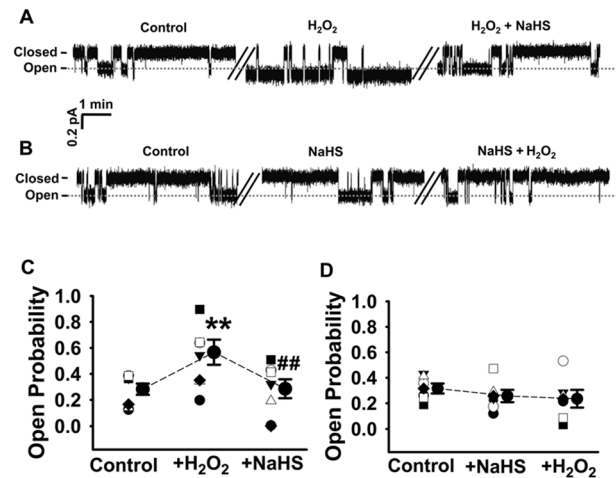

**Figure 1. H<sub>2</sub>S inhibits H<sub>2</sub>O<sub>2</sub>-induced enhancement of ENaC activity in A6 cells.** (A) and (B) Representative single-channel ENaC traces respectively recorded from two A6 cells before and after addition of 3 mM H<sub>2</sub>O<sub>2</sub> and 3 mM H<sub>2</sub>O<sub>2</sub>+0.1 mM NaHS to the basolateral bath; the breaks between the traces indicate omitted 20 min of the recording periods; downward events represent channel openings (the dashed gray line); the currents were monitored for at least 30 min before and after chemical application for both in (A) and (B). (C) and (D) Summarized  $P_o$  of ENaC before and after application of different reagents as indicated ( $n = 6$  paired experiments). \*\*\* $P < 0.01$  compared with control group, ## $P < 0.01$  compared with H<sub>2</sub>O<sub>2</sub> treatment group. doi:10.1371/journal.pone.0064304.g001

intracellular reactive oxygen species (ROS) were examined with a fluorescent probe, DCF (refer to Materials and Methods) in the presence of H<sub>2</sub>O<sub>2</sub>, H<sub>2</sub>O<sub>2</sub>+ NaHS, or NaHS, respectively. We performed experiments in the presence of an iron chelator, 50  $\mu$ M 2,2'-dipyridyl, to confirm whether oxidation is due to Fenton chemistry, where we treated the cells with 2,2'-dipyridyl for three min followed by exposing to H<sub>2</sub>O<sub>2</sub> for 30 min. Our results show that exposure of A6 cells to H<sub>2</sub>O<sub>2</sub>, in the presence of 2,2'-dipyridyl, induced significant accumulation of intracellular ROS levels (Figure 2A and 2C; the same as seen in the absence of 2,2'-dipyridyl). These results suggest that exogenous H<sub>2</sub>O<sub>2</sub>-induced oxidation is not due to Fenton chemistry. Furthermore, in the cells pretreated with 0.1 mM NaHS for 30 min, addition of 3 mM H<sub>2</sub>O<sub>2</sub> failed to increase intercellular ROS (Figure 2B and D). We have carried out the MTT experiments to detect whether H<sub>2</sub>S affects cell viability (Text S1). The MTT assay showed that H<sub>2</sub>S at 0.05, 0.1 and 0.3 mM had no effect on cell viability (Figure S1). These results suggest that H<sub>2</sub>S can reverse H<sub>2</sub>O<sub>2</sub>-induced accumulation of intracellular ROS.

### H<sub>2</sub>S Diminishes H<sub>2</sub>O<sub>2</sub>-induced Elevation of PI(3,4,5)P<sub>3</sub> Near the Apical Compartment of A6 Cells

We have recently shown that H<sub>2</sub>O<sub>2</sub> stimulates ENaC via elevation of PI(3,4,5)P<sub>3</sub> near the apical compartment of the cell membrane [6]. Therefore, we reasoned that NaHS may diminish exogenous H<sub>2</sub>O<sub>2</sub>-induced enhancement of ENaC activity via reducing accumulation of PI(3,4,5)P<sub>3</sub> near the apical compartment of A6 cells. To test this hypothesis, the cells were stably transfected with the EGFP-PH-Akt construct containing the PH domain of Akt which selectively binds to PI(3,4,5)P<sub>3</sub>. Consistent with our previous studies [24], under control conditions PI(3,4,5)P<sub>3</sub> was detected mainly in the lateral and basal membranes (Figure 3A and D); treatment of the cells with 3 mM H<sub>2</sub>O<sub>2</sub> for 30 min

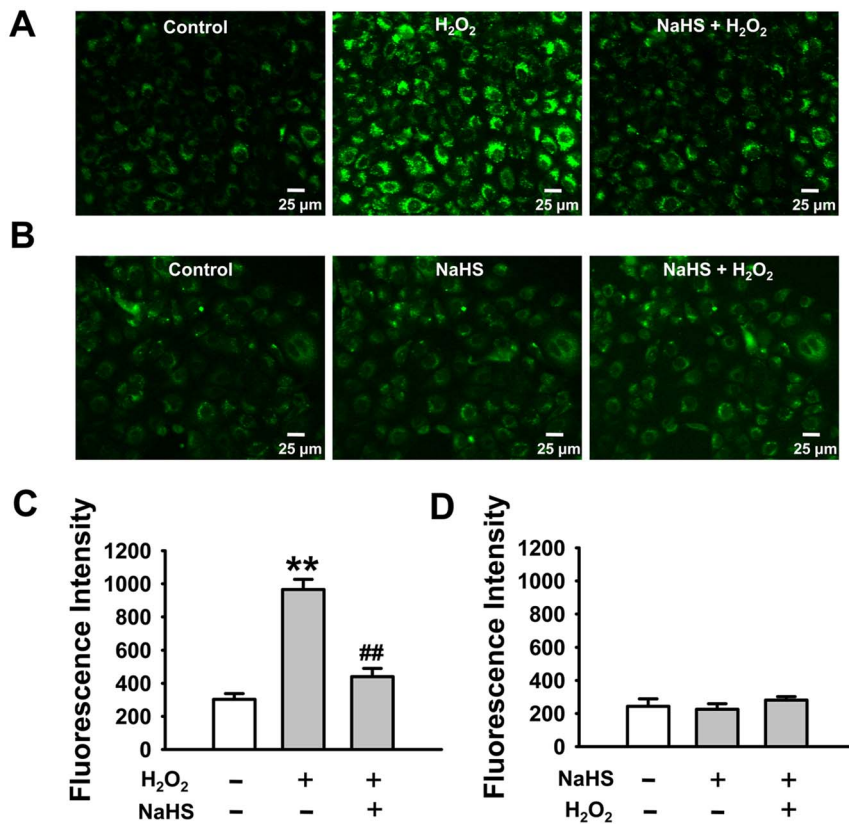

**Figure 2. H<sub>2</sub>S ameliorates H<sub>2</sub>O<sub>2</sub>-elicited oxidative stress in A6 cells.** All experiments were assessed in the presence of 50  $\mu$ M 2,2'-dipyridyl. The images represent the level of intracellular ROS detected by the membrane-permeable fluorescent probe, carboxy-H<sub>2</sub>DCFDA, under indicated conditions in A6 cells. (A) The left image shows that there was a certain residual level of intracellular ROS under control condition; middle image shows a significant elevation of intracellular ROS level upon application of 3 mM H<sub>2</sub>O<sub>2</sub>; right image shows that this H<sub>2</sub>O<sub>2</sub>-induced increase in intracellular ROS was abolished by additional 0.1 mM NaHS. (B) The images represent that the intracellular ROS levels under control (left), treatment of A6 cells with 0.1 mM NaHS for 30 min (middle) followed by additional 0.1 mM H<sub>2</sub>O<sub>2</sub> for 30 min (right). (C) and (D) Summarized fluorescent intensity of (A) and (B), respectively. Data were from three independent paired experiments. \*\* $P < 0.01$  compared with control group, ## $P < 0.01$  compared with H<sub>2</sub>O<sub>2</sub> treatment group. doi:10.1371/journal.pone.0064304.g002

resulted in a dramatic elevation of PI(3,4,5)P<sub>3</sub> near the apical compartment of cell membrane (Figure 3B and E). In contrast, when the cells were treated with 0.1 mM NaHS or co-treated with 0.1 mM NaHS and 3 mM H<sub>2</sub>O<sub>2</sub> for 30 min, there was no significant accumulation of PI(3,4,5)P<sub>3</sub> near the apical compartment of cell membrane (Figure 3C–E). The fluorescent intensity, measured in and in the vicinity of the apical membrane, was used as a readout of PI(3,4,5)P<sub>3</sub> levels. The data shown in Figure 3E represent the mean value of PI(3,4,5)P<sub>3</sub> in or near the apical membrane of three independent experiments. These data suggest that H<sub>2</sub>S prevents H<sub>2</sub>O<sub>2</sub>-induced elevation of PI(3,4,5)P<sub>3</sub> in or near the apical membrane. We have also carried out the confocal experiments to detect the PI(3,4,5)P<sub>3</sub> levels near the apical compartment of membrane in the presence of 0.3 mM, H<sub>2</sub>O<sub>2</sub> (Figure S2). We found that there is a slight, but significant increase in PI(3,4,5)P<sub>3</sub> level near the apical compartment of membrane, albeit required a longer treatment time (one hr).

### H<sub>2</sub>S Ameliorates H<sub>2</sub>O<sub>2</sub>-induced Inactivation of PTEN

PI(3,4,5)P<sub>3</sub> levels are reciprocally controlled by PI3K and the lipid phosphatase PTEN. PTEN negatively regulates the PI3K signaling via dephosphorylation of PI(3,4,5)P<sub>3</sub> to PI(3,4,5)P<sub>2</sub>. It has been reported that ROS can inactivate PTEN [25] and that H<sub>2</sub>O<sub>2</sub> oxidizes PTEN within its catalytic domain by forming a

disulfide bond between Cys124 and Cys71 in the active site, thus inactivating its phosphatase function [9]. Therefore, we tested whether inactivation of PTEN account for H<sub>2</sub>O<sub>2</sub>-induced elevation of PI(3,4,5)P<sub>3</sub>. Although western blot data demonstrated that total PTEN expression in the cells treated with H<sub>2</sub>O<sub>2</sub> for 30 min was not altered (Figure 4A and B), however, the abundance of reduced PTEN (active PTEN) was dramatically decreased in the cells respectively treated with 0.3 mM, 1 mM and 3 mM H<sub>2</sub>O<sub>2</sub> (Figure 4C and 4D). Oxidized PTEN (inactive PTEN) has two less cysteine residues available for alkylation, which results in a lower molecular weight form of the protein. Our results indicated that the abundance of oxidized (inactivated) PTEN in H<sub>2</sub>O<sub>2</sub>-treated cells was significantly greater, compared to that in the cells co-treated with both NaHS and H<sub>2</sub>O<sub>2</sub> (Figure 4E and F). Oxidized PTEN was not detected in either control cells or in the cells pretreated with NaHS alone (Figure 4C, E and F). These results suggest that H<sub>2</sub>S almost completely reverses H<sub>2</sub>O<sub>2</sub>-induced inactivation of PTEN, which accounts, at least in part, for the inhibitory effect of H<sub>2</sub>S on accumulation of PI(3,4,5)P<sub>3</sub> in the apical membrane of A6 cells.

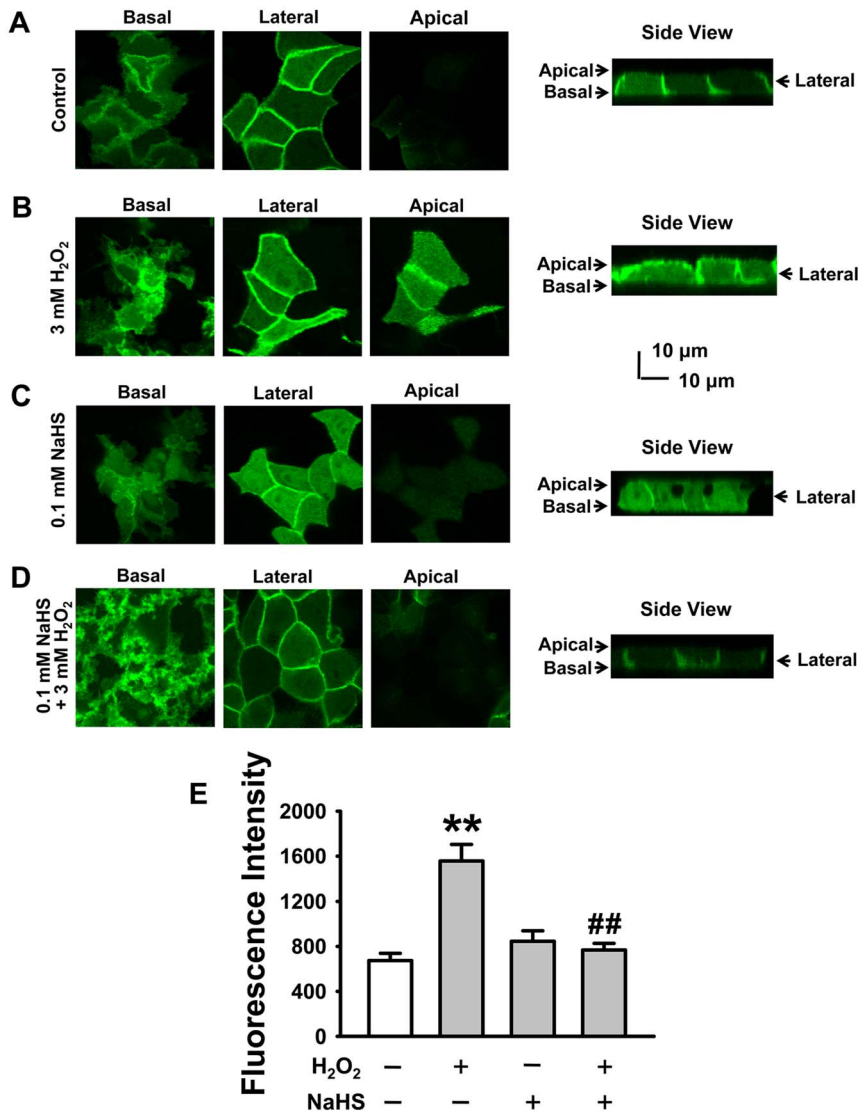

**Figure 3. H<sub>2</sub>S inhibits H<sub>2</sub>O<sub>2</sub>-induced elevation of PI(3,4,5)P<sub>3</sub> near the apical compartment of A6 cells.** Left images show confocal microscopy XY sections of apical, lateral, and basal membranes of A6 cells as indicated. Right images show XZ sections of A6 cells. (A) Control; (B) the cells were treated with 3 mM H<sub>2</sub>O<sub>2</sub> for 30 min; (C) the cells were treated with 0.1 mM NaHS for 30 min; (D) the cells were co-treated with 3 mM H<sub>2</sub>O<sub>2</sub>+0.1 mM NaHS for 30 min. (E) Summarized mean fluorescent intensities measured in and in the vicinity of the apical membrane from three independent experiments, which represent the levels of PI(3,4,5)P<sub>3</sub> near the apical region of the membrane. \*\**P*<0.01 compared with control group, ##*P*<0.01 compared with H<sub>2</sub>O<sub>2</sub> treatment group. doi:10.1371/journal.pone.0064304.g003

### Inhibition of PTEN Leads to Accumulation of PI(3,4,5)P<sub>3</sub> Near the Apical Compartment of Membrane

To further confirm activation of PTEN accounts for the cellular distribution of PI(3,4,5)P<sub>3</sub>, 30 nM BPV<sub>(pic)</sub> (dipotassium bisperoxy(pyridine-2-carboxyl)oxovanadate; ENZO, USA), a specific PTEN inhibitor, was used to treat A6 cells since it has an IC<sub>50</sub> of 20–40 nM [26]. Under control conditions PI(3,4,5)P<sub>3</sub> was mainly located at the basal and lateral membrane (Figure 3A and 5A). In contrast, the PI(3,4,5)P<sub>3</sub> levels near the apical compartment of the cell membrane were significantly increased in A6 cells exposed to BPV<sub>(pic)</sub> to the same degree as seen in 3 mM H<sub>2</sub>O<sub>2</sub> treated cells (Figure 5B, C and E). Compared to the cells treated with BPV<sub>(pic)</sub> alone, treatment of the cells with both BPV<sub>(pic)</sub> and H<sub>2</sub>O<sub>2</sub> induced a slightly, but significantly additive effect on PI(3,4,5)P<sub>3</sub> levels, probably due to additional activation of PI3K by H<sub>2</sub>O<sub>2</sub>

(Figure 5B–E). These results confirm that PTEN activity accounts for accumulation of PI(3,4,5)P<sub>3</sub> near the apical compartment in A6 cells.

### Inhibition of PTEN Enhances ENaC *P*<sub>o</sub>

Since BPV<sub>(pic)</sub> caused increases in PI(3,4,5)P<sub>3</sub> levels, in the following experiments we tested whether application of BPV<sub>(pic)</sub> to A6 can alter ENaC *P*<sub>o</sub>. As shown in Figure 6, ENaC *P*<sub>o</sub> was significantly increased from 0.29±0.02 to 0.56±0.04 by application of BPV<sub>(pic)</sub> to the apical bath (*P*<0.01; n = 6). In parallel with the effects on PI(3,4,5)P<sub>3</sub> levels, treatment of the cells with both BPV<sub>(pic)</sub> and 3 mM H<sub>2</sub>O<sub>2</sub> further increased ENaC *P*<sub>o</sub> from 0.56±0.04 to 0.70±0.04 (Figure 6; *P*<0.05; n = 6). Since H<sub>2</sub>O<sub>2</sub> elevates PI(3,4,5)P<sub>3</sub> both by activating PI3K and by inactivating PTEN, we argue that this synergistic effect of BPV<sub>(pic)</sub> and H<sub>2</sub>O<sub>2</sub>

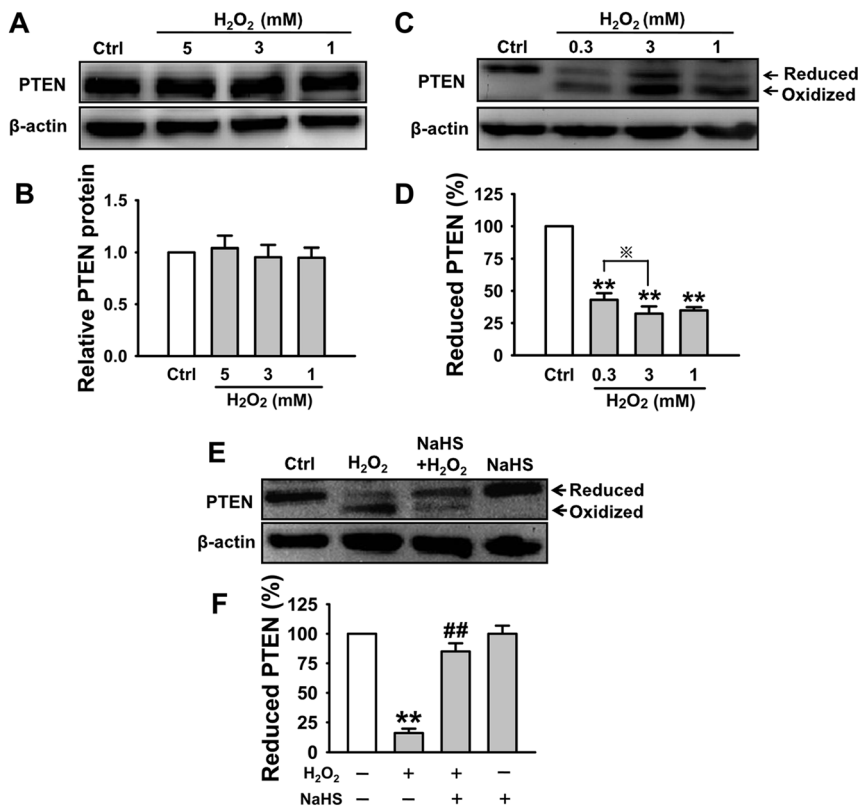

**Figure 4. H<sub>2</sub>O<sub>2</sub> oxidizes PTEN and H<sub>2</sub>S protects PTEN to be oxidized by H<sub>2</sub>O<sub>2</sub>.** All experiments were assessed in the presence of 50 μM 2,2'-dipyridyl. (A) and (B) Western blot analysis demonstrates that the total PTEN protein expression was not altered by treatment of A6 cells with 1 mM, 3 mM and 5 mM H<sub>2</sub>O<sub>2</sub>. (C) and (D) Western blot analysis shows that the magnitude of reduced (active) PTEN was dramatically decreased upon treatment of A6 cells with 0.3 mM, 1 mM and 3 mM H<sub>2</sub>O<sub>2</sub> for 30 min; the intensity of the bands corresponding to reduced PTEN in the top panels of (C) was determined and presented as a percentage of the sum of the intensities of the bands corresponding to the oxidized and reduced proteins. (E) and (F) show that H<sub>2</sub>S protected 3 mM H<sub>2</sub>O<sub>2</sub> induced PTEN oxidation (n=3 in each group) \*\*P<0.01 compared with control group; \*P<0.05 compared with 0.3 mM H<sub>2</sub>O<sub>2</sub> treatment group; ##P<0.01 compared with H<sub>2</sub>O<sub>2</sub> treatment group. doi:10.1371/journal.pone.0064304.g004

on ENaC activity is probably due to H<sub>2</sub>O<sub>2</sub>-induced activation of PI3K [6].

## Discussion

It is well documented that oxidative stress is one of the main causes of salt-induced kidney injury which might be an important mechanism of salt-sensitive hypertension [3,4]. Recently, we have shown that H<sub>2</sub>O<sub>2</sub> stimulates ENaC [6], which plays a key role in maintaining Na<sup>+</sup> homeostasis and consequently controls systemic blood pressure. H<sub>2</sub>S, an endogenous gaseous mediator, exerts various physiological and physiopathological effects *in vivo*, including anti-oxidative stress and anti-inflammatory response in heart, liver, kidney and other organs [27,28,29]. In this study, we show that H<sub>2</sub>O<sub>2</sub> increases ENaC activity by elevating PI(3,4,5)P<sub>3</sub> near the apical compartment of A6 cells via both activation of PI3K and inactivation of PTEN. Moreover, our data suggest that as an antioxidant, H<sub>2</sub>S attenuates H<sub>2</sub>O<sub>2</sub>-induced aberrant activation of ENaC in distal nephron cells by reducing PTEN oxidation.

Our previous study showed that high exogenous concentration of H<sub>2</sub>O<sub>2</sub> is required to counteract the high expression level of catalase in A6 cells, in order to elevate intracellular H<sub>2</sub>O<sub>2</sub>, and to regulate ENaC [6]. We found that exogenous H<sub>2</sub>O<sub>2</sub> does not significantly elevate intracellular ROS until the concentration of exogenous H<sub>2</sub>O<sub>2</sub> was in the millimolar range. However, H<sub>2</sub>O<sub>2</sub>, even at 10 mM, did not result in either cell lysis or apoptosis in A6

cells [6], suggesting that the concentrations of H<sub>2</sub>O<sub>2</sub> used for the current study (3 mM) should not result in any nonspecific effects due to cellular damage. Therefore, such high concentrations of H<sub>2</sub>O<sub>2</sub> can be used as a tool to manipulate the levels of intracellular H<sub>2</sub>O<sub>2</sub> in A6 cells and to investigate the mechanisms by which ROS stimulates ENaC. Furthermore, 0.1–0.3 mM H<sub>2</sub>O<sub>2</sub> induced a similar result in mpkCCD<sub>14</sub> cells (a mouse cortical collecting duct cell line) as seen in A6 cells (unpublished observations), with much shorter latency. Moreover, treatment of A6 cells with 0.3 mM H<sub>2</sub>O<sub>2</sub> for six hrs significantly increased ENaC *P<sub>O</sub>* (data not shown). These results are consistent with the notion that there is a high catalase activity in A6 cells.

The H<sub>2</sub>S level can be up to 0.1 mM in human blood [30] and is about 1.6 nmol/mg in intact kidney of rats [31]. Different concentrations of H<sub>2</sub>S (NaHS) (0.2 mM, 0.4 mM, 0.8 mM or even higher concentration) have been used in the previous *in vitro* studies [32,33]. A recent study showed that NaHS treatment can protect human umbilical vein endothelial cells and fibroblasts against ischemia-reperfusion (I/R)-induced apoptosis [30]. In the present study, we selected the concentrations of 0.1 mM which is more proximate to its physiological levels in human blood. More importantly, our data show that hydrogen sulfide at concentration up to 0.3 mM had no effect on cell viability.

We should note that the inhibitory effect of H<sub>2</sub>S on ENaC activity exhibited a long latency (~20 min). This slow effect of NaHS is consistent with what has been reported previously [34],

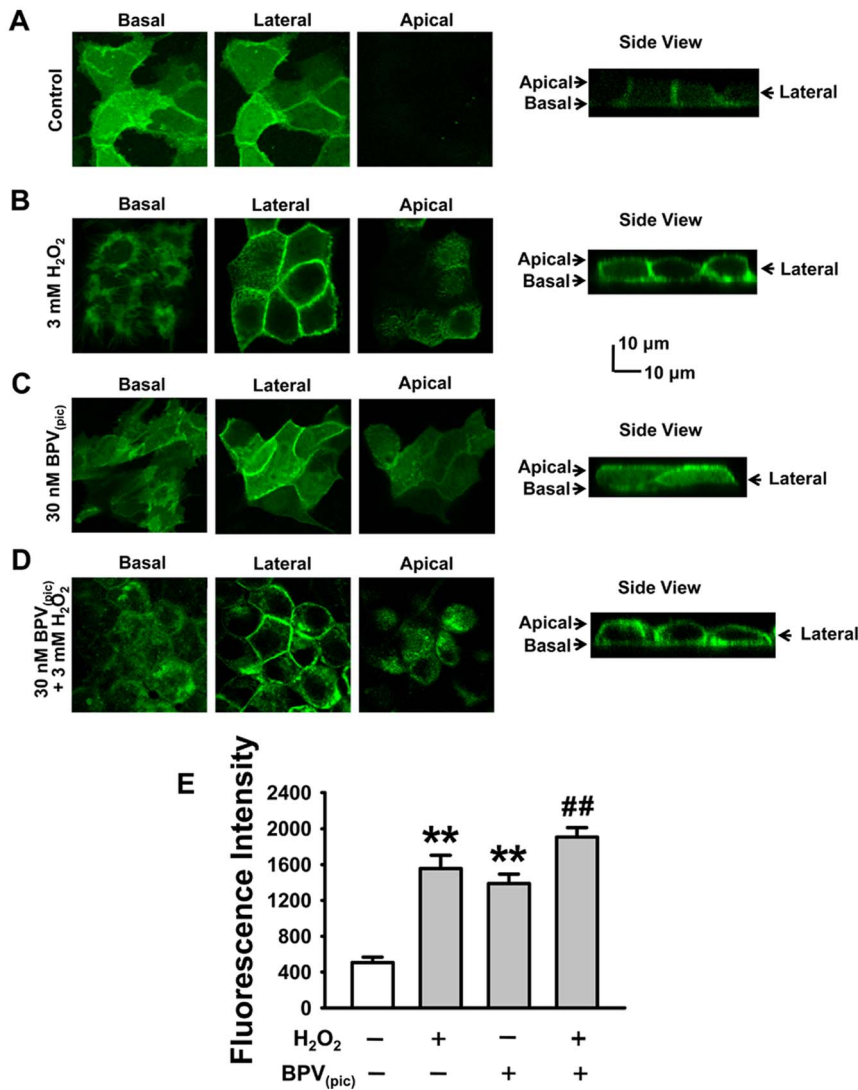

**Figure 5. Inhibition of PTEN by BPV<sub>(pic)</sub> results in accumulation of PI(3,4,5)P<sub>3</sub> near the apical compartment of A6 cells.** The experiments were performed under different conditions as follows: (A) control; (B) the cells were treated with 3 mM H<sub>2</sub>O<sub>2</sub> for 30 min; (C) the cells were treated with 30 nM BPV<sub>(pic)</sub> for 30 min; (D) the cells were co-treated with 30 nM BPV<sub>(pic)</sub> + 3 mM for 30 min. (E) Summarized mean fluorescent intensities measured as ascribed in Figure 3 from three independent experiments, which represent the level of PI(3,4,5)P<sub>3</sub> in the apical membrane. \*\**P*<0.01 compared with control group, ##*P*<0.01 compared with BPV<sub>(pic)</sub> treatment group. doi:10.1371/journal.pone.0064304.g005

where the protective effect of H<sub>2</sub>S on ischemia-reperfusion induced injury, in human umbilical vein endothelial cells, required at least 20 min pretreatment of these cells with 0.1 mM NaHS. Previous studies show that H<sub>2</sub>S readily scavenges CoCl<sub>2</sub>-induced overproduction of ROS in PC12 cells [32,33]. We found that exogenous H<sub>2</sub>O<sub>2</sub>-induced accumulation of intracellular ROS in A6 cells was significantly abrogated by pretreatment of the cells with NaHS. We can not rule out the possibility that NaHS (H<sub>2</sub>S) may carry out its cytoprotective effect, at least in part, via direct chemical reaction with H<sub>2</sub>O<sub>2</sub>, albeit we did observe any visible reaction when these two chemicals were mixed at the concentrations used in current study. We speculate that one of the mechanisms underlying the protective effect of H<sub>2</sub>S on aberrant ENaC activity may be due to a direct chemical reaction of H<sub>2</sub>S with H<sub>2</sub>O<sub>2</sub>; and that this direct chemical reaction dramatically diminishes the ability of H<sub>2</sub>O<sub>2</sub> to oxidize PTEN and subsequently enhances the apical distribution of PI(3,4,5)P<sub>3</sub>. Such direct

chemical reaction has been reported by Geng *et al.*, where H<sub>2</sub>S directly scavenges superoxide anions and H<sub>2</sub>O<sub>2</sub>, and consequently eliminates ROS-induced malondialdehyde (MDA) generation [35].

Manna and Jain reported that H<sub>2</sub>S can increase cellular level of PI(3,4,5)P<sub>3</sub> and can enhance glucose utilization in high concentration of glucose treated adipocytes by activating PI3K and inhibiting PTEN [14,36]. These authors also demonstrated that there is a decreased cellular PI(3,4,5)P<sub>3</sub> level and impaired glucose homeostasis in the liver of both type 1 and type 2 diabetic rats [36]. In contrast, our data suggest that NaHS did not affect total expression level of PTEN, but significantly prevented H<sub>2</sub>O<sub>2</sub>-induced inactivation of PTEN, thereby reversed H<sub>2</sub>O<sub>2</sub>-induced accumulation of PI(3,4,5)P<sub>3</sub> near the apical compartment of A6 cells. The difference between the results obtained by Manna *et al.* and ours might be explained by cell model-dependence. Nevertheless, diabetes is associated with lower circulating level of H<sub>2</sub>S

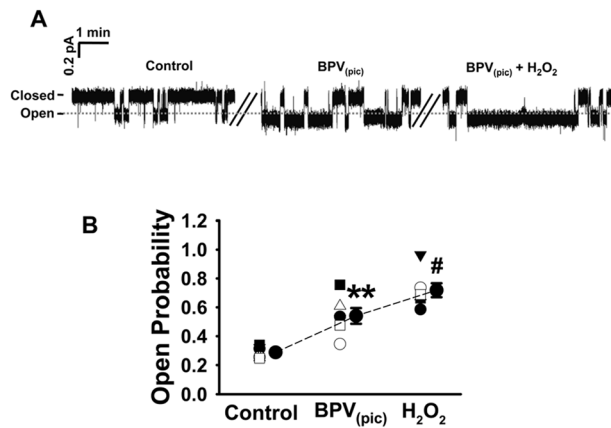

**Figure 6. Inhibition of PTEN leads to an aberrant activation of ENaC in A6 cells.** Representative single-channel ENaC trace recorded from an A6 cell before and after addition of 30 nM BPV<sub>(pic)</sub> and 3 mM H<sub>2</sub>O<sub>2</sub> to the basolateral bath. Two breaks between the traces indicate the 20 min omitted recording periods. (B) Summarized  $P_o$  of ENaC before and post application of different reagents.  $n=5$  paired experiments.  $^{**}P<0.01$  compared with control group,  $^{\#}P<0.05$  compared with BPV<sub>(pic)</sub> treatment group. doi:10.1371/journal.pone.0064304.g006

compared to normal population [30,37,38] and diabetes exerts a higher incidence of hypertension. Our results along with the findings by Manna and Jain suggest that H<sub>2</sub>S may be used for treatment of diabetes associated hypertension by affecting cellular level and distribution of PI(3,4,5)P<sub>3</sub>.

Oxidation of PTEN by ROS/H<sub>2</sub>O<sub>2</sub> has been reported in HEK293 cells stimulated with insulin [9], HeLa cells stimulated with epidermal growth factor [9], and fibroblasts stimulated with platelet-derived growth factor [39]. It has been shown that PI(3,4,5)P<sub>3</sub> can laterally diffuse in the inner leaflet of epithelial cell membranes from the basolateral membrane domain, where it is generated, to the apical membrane domain [40]. Theoretically, the apical PI(3,4,5)P<sub>3</sub> would be rapidly degraded because the lipid phosphatase PTEN is mainly located in the apical membrane in epithelial cells [24]. H<sub>2</sub>O<sub>2</sub> not only inactivates PTEN but also activates PI3K [6] which phosphorylates PI(4,5)P<sub>2</sub> to produce PI(3,4,5)P<sub>3</sub>. NaHS prevents H<sub>2</sub>O<sub>2</sub> induced inactivation of PTEN, but may not affect the PI3K activity. Therefore, it is not surprising that NaHS prevents accumulation of H<sub>2</sub>O<sub>2</sub>-induced PI(3,4,5)P<sub>3</sub> specifically near the apical compartment but not in the lateral and basal membranes. Since only the levels of PI(3,4,5)P<sub>3</sub> in the apical membrane are important to ENaC function, we have not quantified the fluorescent intensity of basal and lateral membranes. They may vary from cell to cell. Our data show that NaHS may not prevent accumulation of H<sub>2</sub>O<sub>2</sub>-induced PI(3,4,5)P<sub>3</sub> in the basal and lateral membranes (Figure 3).

Leslie and co-workers demonstrated that oxidative inactivation of PTEN in the cells exposed to H<sub>2</sub>O<sub>2</sub> is accompanied by an increase in cellular PI(3,4,5)P<sub>3</sub> [41]. Furthermore, oxidation of PTEN with H<sub>2</sub>O<sub>2</sub> leads to the formation of a disulfide bond between Cys124 residue and a nearby Cys71 residue in the active site, thus inactivating its phosphatase function of PTEN [10]. Oxidized PTEN has two less cysteine residues available for alkylation, which should lead to a lower molecular weight form of the protein. Consistent with this notion, we found that the abundance reduced (active) form of PTEN was dramatically reduced in A6 cells incubated with H<sub>2</sub>O<sub>2</sub>, whereas the magnitude

of oxidized (inactivated) PTEN was significantly augmented in H<sub>2</sub>O<sub>2</sub>-treated A6 cells. However, there was no significant change in the abundance of total PTEN upon treatment A6 cells with H<sub>2</sub>O<sub>2</sub>. These results suggest that H<sub>2</sub>O<sub>2</sub> inactivates PTEN by oxidizing its cysteine residues, which results in a defective hydrolysis of PI(3,4,5)P<sub>3</sub>. We suggest that the protective effect of H<sub>2</sub>S on aberrant ENaC activity caused by exogenous H<sub>2</sub>O<sub>2</sub> is most likely due to the fact, that H<sub>2</sub>S can antagonize H<sub>2</sub>O<sub>2</sub> mediated PTEN catalytic inactivation.

The importance of PTEN in regulating cellular distribution of PI(3,4,5)P<sub>3</sub> is also supported by the results obtained by the pharmacological experiments, where application of BPV<sub>(pic)</sub>, a specific PTEN inhibitor, to the cells leads to accumulation of PI(3,4,5)P<sub>3</sub> near the apical compartment of membrane and to an increase in ENaC  $P_o$ . While the cells were incubated with both BPV<sub>(pic)</sub> and H<sub>2</sub>O<sub>2</sub>, the abundance of PI(3,4,5)P<sub>3</sub> near the apical compartment of the cell membrane and ENaC activity were increased. These synergistic effect of BPV<sub>(pic)</sub> and H<sub>2</sub>O<sub>2</sub> on ENaC and PI(3,4,5)P<sub>3</sub> might be due to H<sub>2</sub>O<sub>2</sub> -induced activation of PI3K.

Consistent with our previous findings [6], H<sub>2</sub>O<sub>2</sub> not only increases ENaC  $P_o$ , but also elevates ENaC single-channel amplitude. Interestingly, the effect of H<sub>2</sub>O<sub>2</sub> on ENaC single-channel amplitude is also abolished by NaHS. The mechanism by which H<sub>2</sub>O<sub>2</sub> elevates ENaC single-channel amplitude remains to be determined. We also noticed that treatment of the cell with H<sub>2</sub>S alone also slightly, but insignificantly decreased ENaC  $P_o$ , this result suggests that slight oxidation stress may account, at least in part, for basal ENaC activity because A6 cells we used were cultured in the presence of aldosterone, which is known to elevate ROS in A6 cells [5]. However, H<sub>2</sub>S appears to be more important for strongly activated ENaC under oxidative stress. Since oxidative stress is common in salt-sensitive kidney [3,4], further investigation of the effect of H<sub>2</sub>S on ENaC activity in animal models may benefit the clinical management of salt-sensitive hypertension.

## Supporting Information

**Figure S1 H<sub>2</sub>S does not affect cell viability.** Cell viability was estimated by MTT assays. NaHS at concentrations of 0.05, 0.1 and 0.3 mM had no effect on cell viability. (TIF)

**Figure S2 Effect of 0.3 H<sub>2</sub>O<sub>2</sub> on PI(3,4,5)P<sub>3</sub> levels near the apical compartment of A6 cells.** Left images show confocal microscopy XY sections in the vicinity of the apical, lateral, and basal membranes of A6 cells as indicated. Right images show XZ sections of A6 cells. (A) Control; (B) A6 cells were treated with 0.3 mM for one hr. (D) Summarized mean fluorescent intensities measured in and in the vicinity of the apical membrane from three independent experiments, which represent the level of PI(3,4,5)P<sub>3</sub> near the apical compartment of the cell membrane.  $^{*}P<0.05$  compared with control group. (TIF)

**Text S1 MTT assay has been used to detect whether H<sub>2</sub>S affects viability of A6 cells.** (DOC)

## Author Contributions

Conceived and designed the experiments: ZZ HM DZ. Performed the experiments: JZ SC BZ YZ KM. Analyzed the data: HL QW. Contributed reagents/materials/analysis tools: JZ SC KM. Wrote the paper: HL ZZ. Revised the manuscript: HM.



## References

- Warnock DG (2001) Liddle syndrome: genetics and mechanisms of Na<sup>+</sup> channel defects. *Am J Med Sci* 322: 302–307.
- Mori T, O'Connor PM, Abe M, Cowley AW Jr (2007) Enhanced superoxide production in renal outer medulla of Dahl salt-sensitive rats reduces nitric oxide tubular-vascular cross-talk. *Hypertension* 49: 1336–1341.
- Taylor NE, Cowley AW Jr (2005) Effect of renal medullary H<sub>2</sub>O<sub>2</sub> on salt-induced hypertension and renal injury. *Am J Physiol Regul Integr Comp Physiol* 289: R1573–1579.
- Taylor NE, Glocka P, Liang M, Cowley AW Jr (2006) NADPH oxidase in the renal medulla causes oxidative stress and contributes to salt-sensitive hypertension in Dahl S rats. *Hypertension* 47: 692–698.
- Yu L, Bao HF, Self JL, Eaton DC, Helms MN (2007) Aldosterone-induced increases in superoxide production counters nitric oxide inhibition of epithelial Na channel activity in A6 distal nephron cells. *Am J Physiol Renal Physiol* 293: F1666–1677.
- Ma HP (2011) Hydrogen peroxide stimulates the epithelial sodium channel through a phosphatidylinositol 3-kinase-dependent pathway. *J Biol Chem* 286: 32444–32453.
- Pochynyuk O, Tong Q, Staruschenko A, Stockand JD (2007) Binding and direct activation of the epithelial Na<sup>+</sup> channel (ENaC) by phosphatidylinositides. *J Physiol* 580: 365–372.
- Gericke A, Munson M, Ross AH (2006) Regulation of the PTEN phosphatase. *Gene* 374: 1–9.
- Kwon J, Lee SR, Yang KS, Ahn Y, Kim YJ, et al. (2004) Reversible oxidation and inactivation of the tumor suppressor PTEN in cells stimulated with peptide growth factors. *Proc Natl Acad Sci U S A* 101: 16419–16424.
- Lee SR, Yang KS, Kwon J, Lee C, Jeong W, et al. (2002) Reversible inactivation of the tumor suppressor PTEN by H<sub>2</sub>O<sub>2</sub>. *J Biol Chem* 277: 20336–20342.
- Cheng Y, Ndisang JF, Tang G, Cao K, Wang R (2004) Hydrogen sulfide-induced relaxation of resistance mesenteric artery beds of rats. *Am J Physiol Heart Circ Physiol* 287: H2316–2323.
- Cai WJ, Wang MJ, Moore PK, Jin HM, Yao T, et al. (2007) The novel proangiogenic effect of hydrogen sulfide is dependent on Akt phosphorylation. *Cardiovasc Res* 76: 29–40.
- Hu Y, Chen X, Pan TT, Neo KL, Lee SW, et al. (2008) Cardioprotection induced by hydrogen sulfide preconditioning involves activation of ERK and PI3K/Akt pathways. *Pflugers Arch* 455: 607–616.
- Manna P, Jain SK (2011) Hydrogen sulfide and L-cysteine increase phosphatidylinositol 3,4,5-trisphosphate (PIP<sub>3</sub>) and glucose utilization by inhibiting phosphatase and tensin homolog (PTEN) protein and activating phosphoinositide 3-kinase (PI3K)/serine/threonine protein kinase (AKT)/protein kinase Czeta/lambda (PKCzeta/lambda) in 3T3L1 adipocytes. *J Biol Chem* 286: 39848–39859.
- Sun YG, Cao YX, Wang WW, Ma SF, Yao T, et al. (2008) Hydrogen sulphide is an inhibitor of L-type calcium channels and mechanical contraction in rat cardiomyocytes. *Cardiovasc Res* 79: 632–641.
- Kimura Y, Kimura H (2004) Hydrogen sulfide protects neurons from oxidative stress. *FASEB J* 18: 1165–1167.
- Tang XQ, Yang CT, Chen J, Yin WL, Tian SW, et al. (2008) Effect of hydrogen sulphide on beta-amyloid-induced damage in PC12 cells. *Clin Exp Pharmacol Physiol* 35: 180–186.
- Lu M, Hu LF, Hu G, Bian JS (2008) Hydrogen sulfide protects astrocytes against H<sub>2</sub>O<sub>2</sub>-induced neural injury via enhancing glutamate uptake. *Free Radic Biol Med* 45: 1705–1713.
- Whiteman M, Armstrong JS, Chu SH, Jia-Ling S, Wong BS, et al. (2004) The novel neuromodulator hydrogen sulfide: an endogenous peroxynitrite 'scavenger'? *J Neurochem* 90: 765–768.
- Zhang ZR, Chou CF, Wang J, Liang YY, Ma HP (2010) Anionic phospholipids differentially regulate the epithelial sodium channel (ENaC) by interacting with alpha, beta, and gamma ENaC subunits. *Pflugers Arch* 459: 377–387.
- Wang J, Zhang ZR, Chou CF, Liang YY, Gu Y, et al. (2009) Cyclosporine stimulates the renal epithelial sodium channel by elevating cholesterol. *Am J Physiol Renal Physiol* 296: F284–290.
- Shatalin K, Shatalina E, Mironov A, Nudler E (2011) H<sub>2</sub>S: a universal defense against antibiotics in bacteria. *Science* 334: 986–990.
- Johansen D, Ytrehus K, Baxter GF (2006) Exogenous hydrogen sulfide (H<sub>2</sub>S) protects against regional myocardial ischemia-reperfusion injury—Evidence for a role of K<sub>ATP</sub> channels. *Basic Res Cardiol* 101: 53–60.
- Martin-Belmonte F, Gassama A, Datta A, Yu W, Rescher U, et al. (2007) PTEN-mediated apical segregation of phosphoinositides controls epithelial morphogenesis through Cdc42. *Cell* 128: 383–397.
- Ha HL, Yu DY (2010) HBx-induced reactive oxygen species activates hepatocellular carcinogenesis via dysregulation of PTEN/Akt pathway. *World J Gastroenterol* 16: 4932–4937.
- Schmid AC, Byrne RD, Vilar R, Woscholski R (2004) Bisperoxovanadium compounds are potent PTEN inhibitors. *FEBS Lett* 566: 35–38.
- Bian JS, Yong QC, Pan TT, Feng ZN, Ali MY, et al. (2006) Role of hydrogen sulfide in the cardioprotection caused by ischemic preconditioning in the rat heart and cardiac myocytes. *J Pharmacol Exp Ther* 316: 670–678.
- Fiorucci S, Antonelli E, Mencarelli A, Orlandi S, Renga B, et al. (2005) The third gas: H<sub>2</sub>S regulates perfusion pressure in both the isolated and perfused normal rat liver and in cirrhosis. *Hepatology* 42: 539–548.
- Tripatara P, Patel NS, Brancaleone V, Renshaw D, Rocha J, et al. (2009) Characterisation of cystathionine gamma-lyase/hydrogen sulphide pathway in ischaemia/reperfusion injury of the mouse kidney: an in vivo study. *Eur J Pharmacol* 606: 205–209.
- Jain SK, Bull R, Rains JL, Bass PF, Levine SN, et al. (2010) Low levels of hydrogen sulfide in the blood of diabetes patients and streptozotocin-treated rats causes vascular inflammation? *Antioxid Redox Signal* 12: 1333–1337.
- Xu Z, Prathapasinghe G, Wu N, Hwang SY, Siow YL, et al. (2009) Ischemia-reperfusion reduces cystathionine-beta-synthase-mediated hydrogen sulfide generation in the kidney. *Am J Physiol Renal Physiol* 297: F27–35.
- Yang C, Yang Z, Zhang M, Dong Q, Wang X, et al. (2011) Hydrogen sulfide protects against chemical hypoxia-induced cytotoxicity and inflammation in HaCaT cells through inhibition of ROS/NF-kappaB/COX-2 pathway. *PLoS One* 6: e21971.
- Lan A, Liao X, Mo L, Yang C, Yang Z, et al. (2011) Hydrogen sulfide protects against chemical hypoxia-induced injury by inhibiting ROS-activated ERK1/2 and p38MAPK signaling pathways in PC12 cells. *PLoS One* 6: e25921.
- Henderson PW, Singh SP, Belkin D, Nagineni V, Weinstein AL, et al. (2010) Hydrogen sulfide protects against ischemia-reperfusion injury in an in vitro model of cutaneous tissue transplantation. *J Surg Res* 159: 451–455.
- Geng B, Chang L, Pan C, Qi Y, Zhao J, et al. (2004) Endogenous hydrogen sulfide regulation of myocardial injury induced by isoproterenol. *Biochem Biophys Res Commun* 318: 756–763.
- Manna P, Jain SK (2012) Decreased hepatic phosphatidylinositol-3,4,5-trisphosphate (PIP<sub>3</sub>) levels and impaired glucose homeostasis in type 1 and type 2 diabetic rats. *Cell Physiol Biochem* 30: 1363–1370.
- Sekhar RV, McKay SV, Patel SG, Guthikonda AP, Reddy VT, et al. (2010) Glutathione synthesis is diminished in patients with uncontrolled diabetes and restored by dietary supplementation with cysteine and glycine. *Diabetes Care* 34: 162–167.
- Whiteman M, Gooding KM, Whatmore JL, Ball CI, Mawson D, et al. (2010) Adiposity is a major determinant of plasma levels of the novel vasodilator hydrogen sulphide. *Diabetologia* 53: 1722–1726.
- Seo JH, Ahn Y, Lee SR, Yeol Yeo C, Chung Hur K (2005) The major target of the endogenously generated reactive oxygen species in response to insulin stimulation is phosphatase and tensin homolog and not phosphoinositide-3 kinase (PI-3 kinase) in the PI-3 kinase/Akt pathway. *Mol Biol Cell* 16: 348–357.
- Blazer-Yost BL, Vahle JC, Byars JM, Bacallao RL (2004) Real-time three-dimensional imaging of lipid signal transduction: apical membrane insertion of epithelial Na<sup>+</sup> channels. *Am J Physiol Cell Physiol* 287: C1569–1576.
- Leslie NR, Bennett D, Lindsay YE, Stewart H, Gray A, et al. (2003) Redox regulation of PI 3-kinase signalling via inactivation of PTEN. *EMBO J* 22: 5501–5510.
